# Supplementary material
Source: PubMed Central journal article supplement (PMC4258175)
Supplement: NIHMS637312-supplement-2.pdf [file NIHMS637312-supplement-2.pdf]

**ESM Table 1:** List of primers used to determine *CaCna1d*, *Gk*, *Glut2*, *Ins1*, *Ins2*, *Kir6.2*, *Pdx1*, *Tbp* and *Tcptp* expression.

| <b>Gene</b>    | <b>Forward 5'-&gt;3'</b> | <b>Reverse 5'-&gt;3'</b> |
|----------------|--------------------------|--------------------------|
| <i>CaCna1d</i> | CTTCGTCATCGTCACCTTCCA    | TGAACATCTTGGACTGCTCA     |
| <i>Gk</i>      | CAGAAGGGAACAACATCGTG     | CCGCCAATGATCTTTTCGTA     |
| <i>Glut2</i>   | TGAGTTCCTTCCAGTTCG       | AGGGAGCTGGTGTGTTGTGTA    |
| <i>Ins1</i>    | TAGTGACCAGCTATAATCAGAG   | ACGCCAAGGTCTGAAGGTCC     |
| <i>Ins2</i>    | CCCTGCTGGCCCTGCTCTT      | AGGTCTGAAGGTCACCTGCT     |
| <i>Kir6.2</i>  | TAGGCCAAGCCAGTGTAGTG     | GTGGTGAACACATCCTGCAG     |
| <i>Pdx1</i>    | TGTAGGCAGTACGGGTCCTC     | CCACCCCAGTTTACAAGCTC     |
| <i>Tbp</i>     | TTGGCTAGGTTTCTGCGGTC     | GCCCTGAGCATAAGGTGGAA     |
| <i>Tcptp</i>   | AGAGTGGCCAAGTTTCCAGA     | CACACCATGAGCCAGAAATG     |
