# Supplementary material
Source: PubMed Central journal article supplement (PMC4258175)
Supplement: NIHMS637312-supplement-3.pdf [file NIHMS637312-supplement-3.pdf]

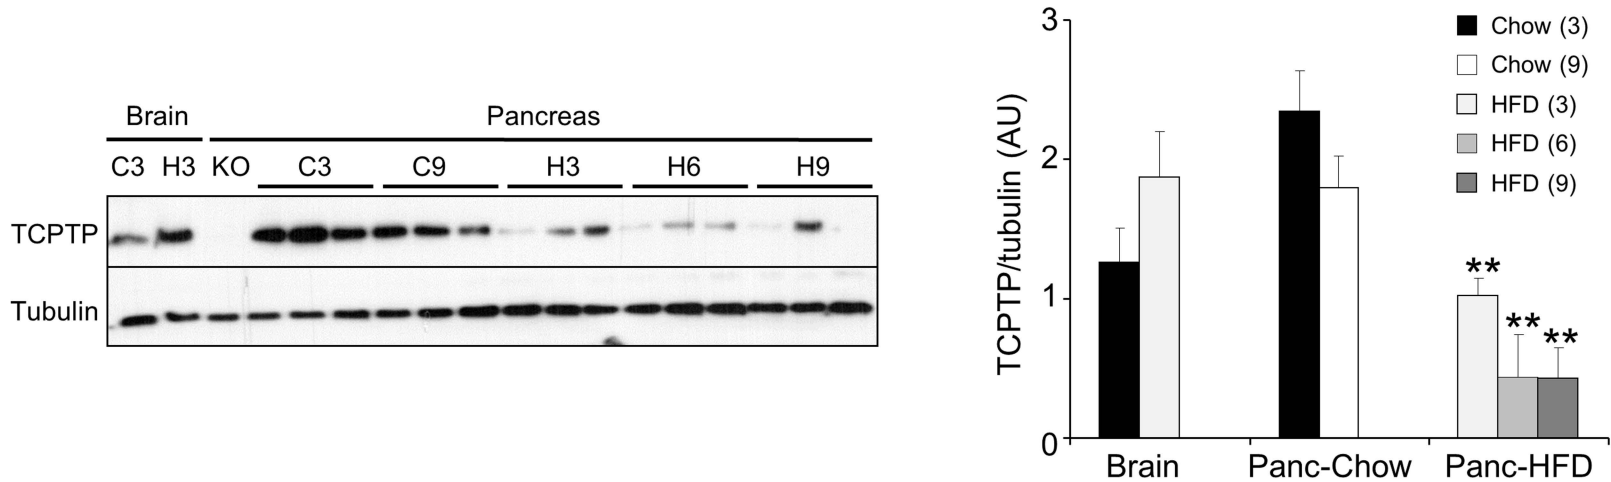

**ESM Fig. 1: High fat feeding modulates TCPTP expression.** Lysates of brain and pancreas of wild type mice that were fed regular chow (C) or HFD (H) for 3, 6 or 9 months were immunoblotted for TCPTP and Tubulin as a loading control, n=3. As a negative control pancreas lysates from panc-TCPTP KO mice were used. Bar graph represents TCPTP expression normalised to Tubulin and presented as means  $\pm$  SEM. \*\* $p < 0.01$  HFD vs chow-fed mice.
