# Supplementary material
Source: PubMed Central journal article supplement (PMC4258175)
Supplement: NIHMS637312-supplement-4.pdf [file NIHMS637312-supplement-4.pdf]

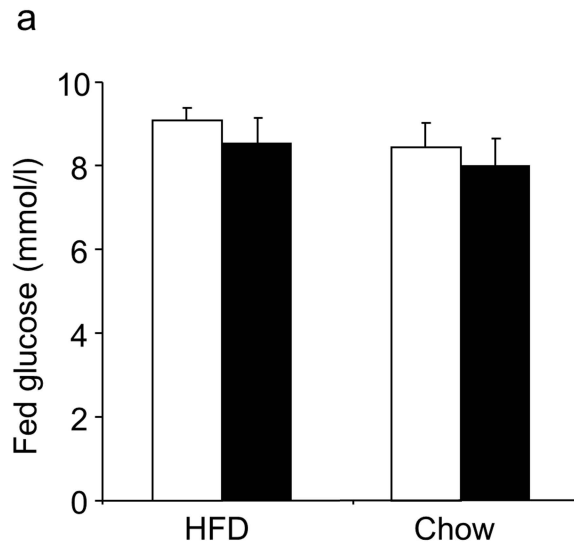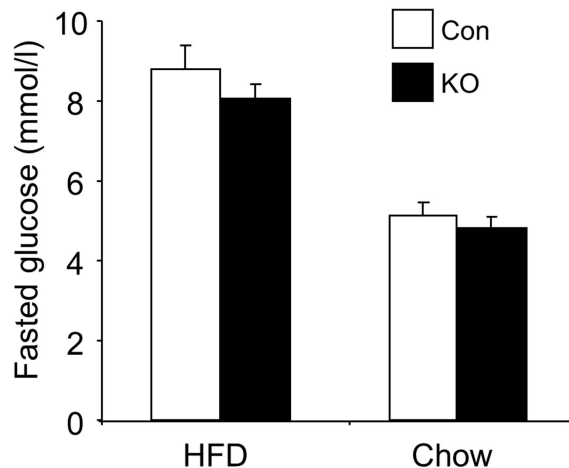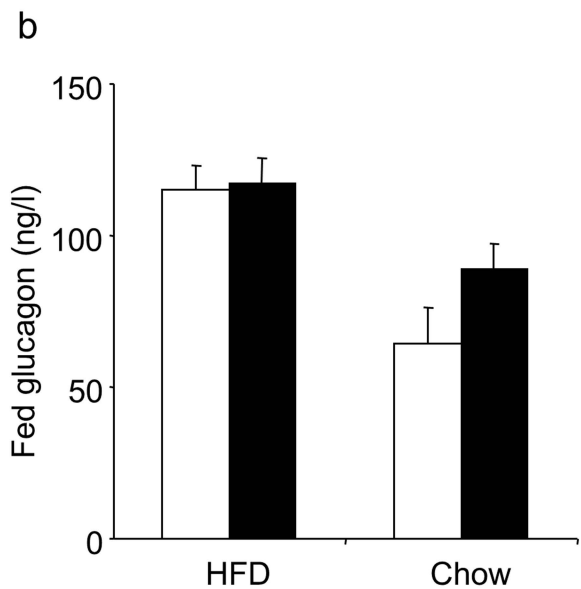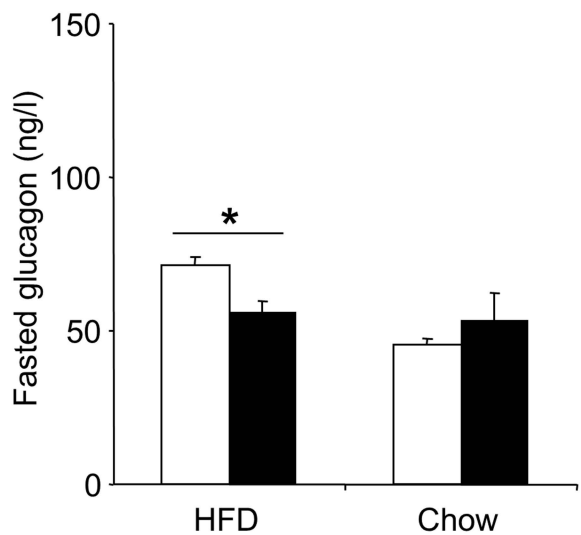

**ESM Fig. 2: Metabolic variables of mice with pancreatic TCPTP deletion.** Glucose (a) and glucagon (b) concentrations in serum of fed and fasted control (Con) and panc-TCPTP KO mice fed chow (Con, n=4 and KO, n=8) and HFD (Con, n=6 and KO, n=11) at 55 weeks of age. \* $p < 0.05$  Con vs KO mice fed HFD.
