# Supplementary material
Source: PubMed Central journal article supplement (PMC4258175)
Supplement: NIHMS637312-supplement-5.pdf [file NIHMS637312-supplement-5.pdf]

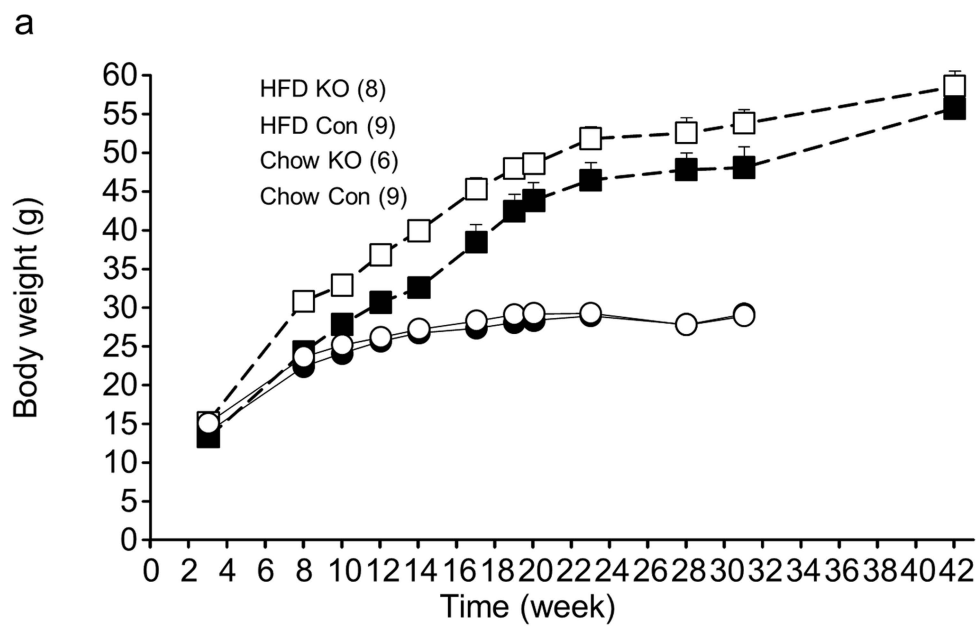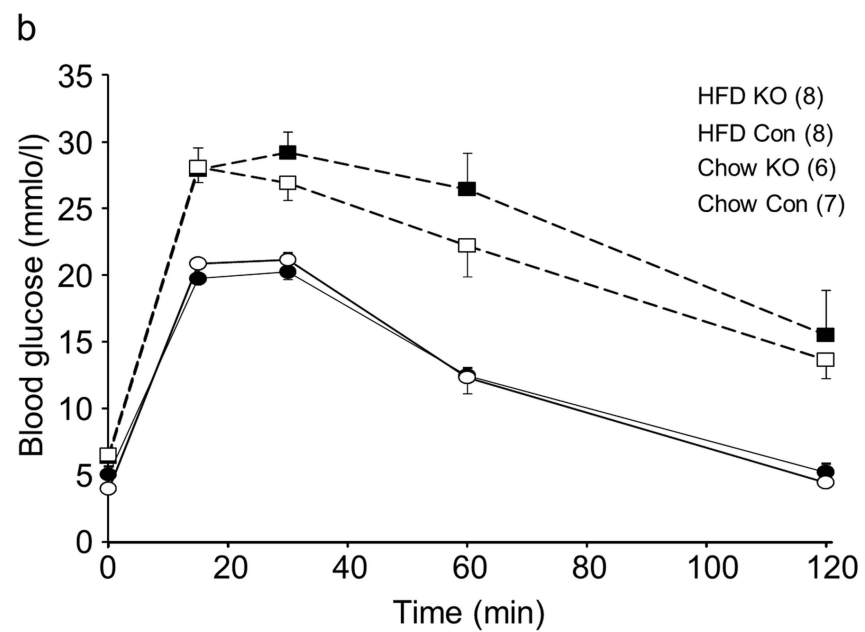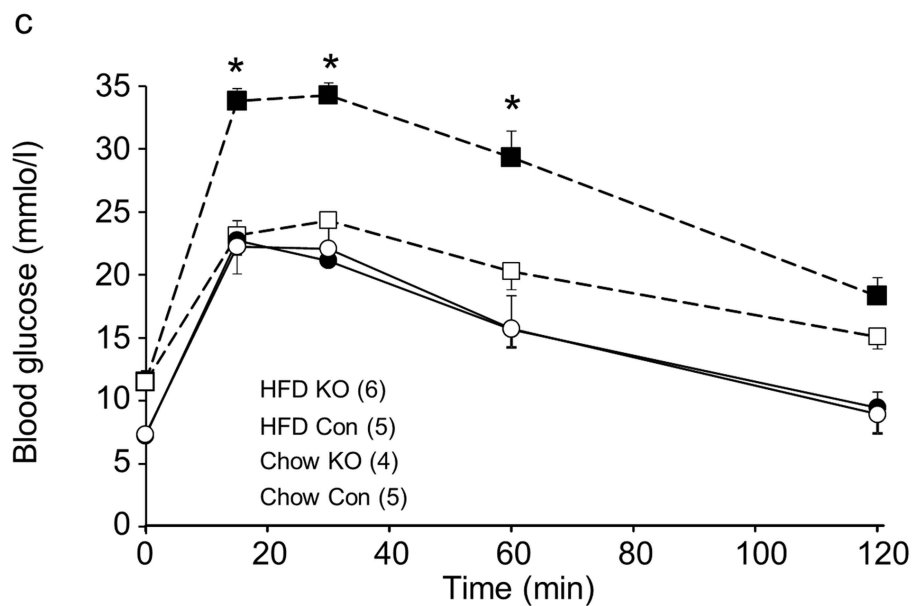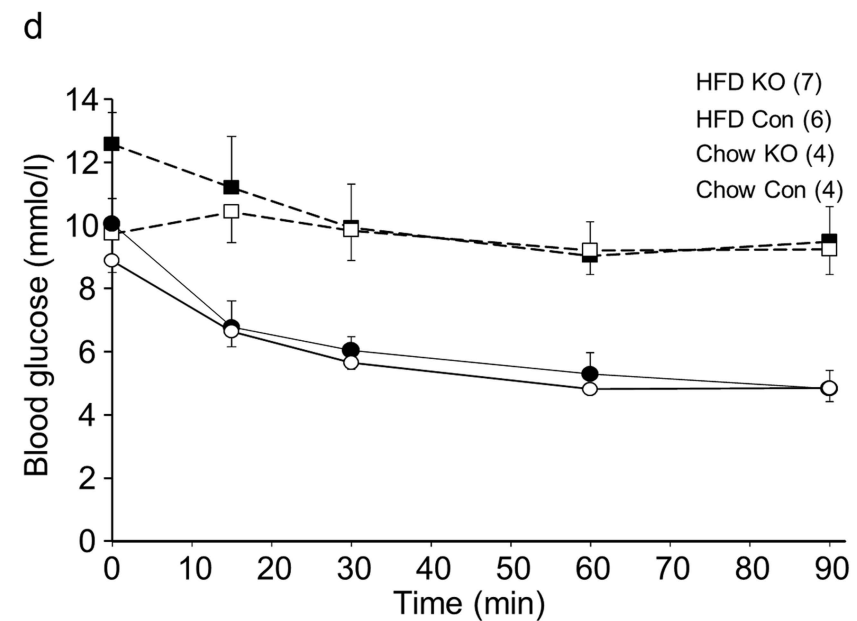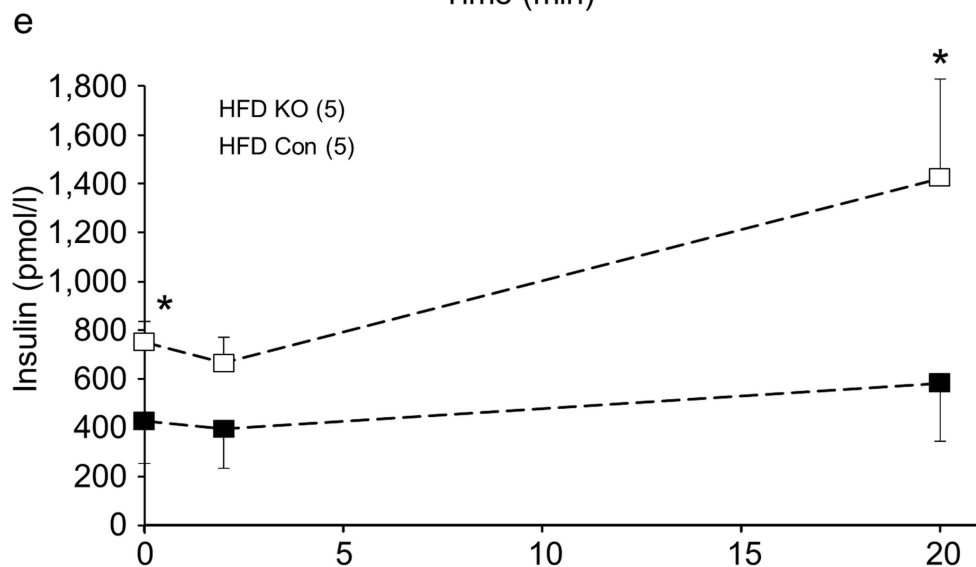

**ESM Fig. 3: Glucose intolerance and attenuated GSIS in an independent cohort of mice with pancreatic TCPTP deletion.** **a)** Body weights of control (white symbols) and panc-TCPTP KO (black symbols) male mice fed regular chow (full lines) and HFD (dotted lines). GTTs were performed at 23 (**b**) and 46 (**c**) weeks of age. **d)** ITT was performed at 46 weeks of age. Data are presented as mean  $\pm$  SEM,  $n=4-9$ . \* $p<0.05$  control vs panc-TCPTP KO. **e)** Circulating insulin concentrations in 50-week old male control and panc-TCPTP KO fed HFD at 2 and 20 minutes after IP injection of glucose. \* $p<0.05$  control vs panc-TCPTP KO.
